# Supplementary material for: The value of genomic relationship matrices to estimate levels of inbreeding
Source: PubMed Central journal article supplement (PMC8088726; doi:10.1186/s12711-021-00635-0), 2021-05-01

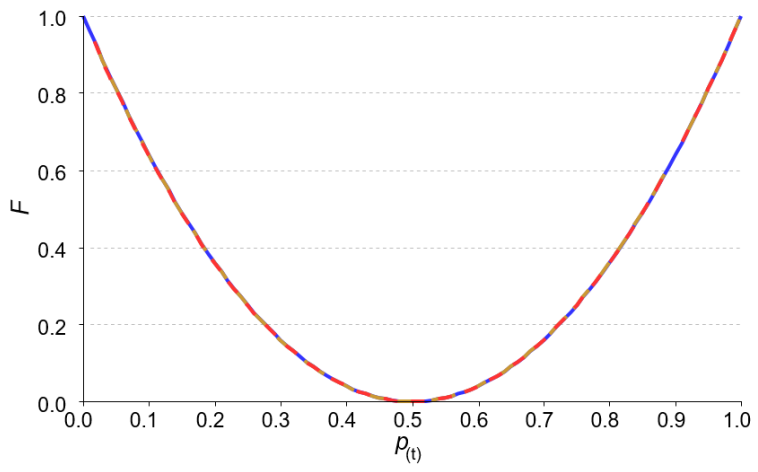

Supplement: 12711_2021_635_MOESM1_ESM.pdf [file 12711_2021_635_MOESM1_ESM.pdf]
